# Supplementary material for: Removal of multi-substituted nitroaromatic pollutants by zero valent iron: a comparison of performance, kinetics, toxicity and mechanisms
Source: Royal Society of Chemistry journal article supplement (doi:10.1039/c5cp02518d), 2015-01-01
Supplement: c5cp02518d1.pdf [file c5cp02518d1.pdf]

**Supplementary Information**

**for**

**Removal of multi-substituted nitroaromatic pollutants by zero valent iron: a  
comparison of performance, kinetics, toxicity and mechanisms**

Changjin Ou, Shuai Zhang, Jianguo Liu, Jinyou Shen\*, Yan Liu, Xiuyun Sun,  
Jiansheng Li, Lianjun Wang\*

Jiangsu Key Laboratory for Chemical Pollution Control and Resources Reuse, School  
of Environmental and Biological Engineering, Nanjing University of Science and  
Technology, Nanjing 210094, Jiangsu Province, China

**\* Corresponding author:**

Lianjun Wang, Tel./fax: +86 25 84315941, E-mail: wanglj@mail.njust.edu.cn or

Jinyou Shen, Tel./fax: +86 25 84303965, E-mail: shenjinyou@mail.njust.edu.cn

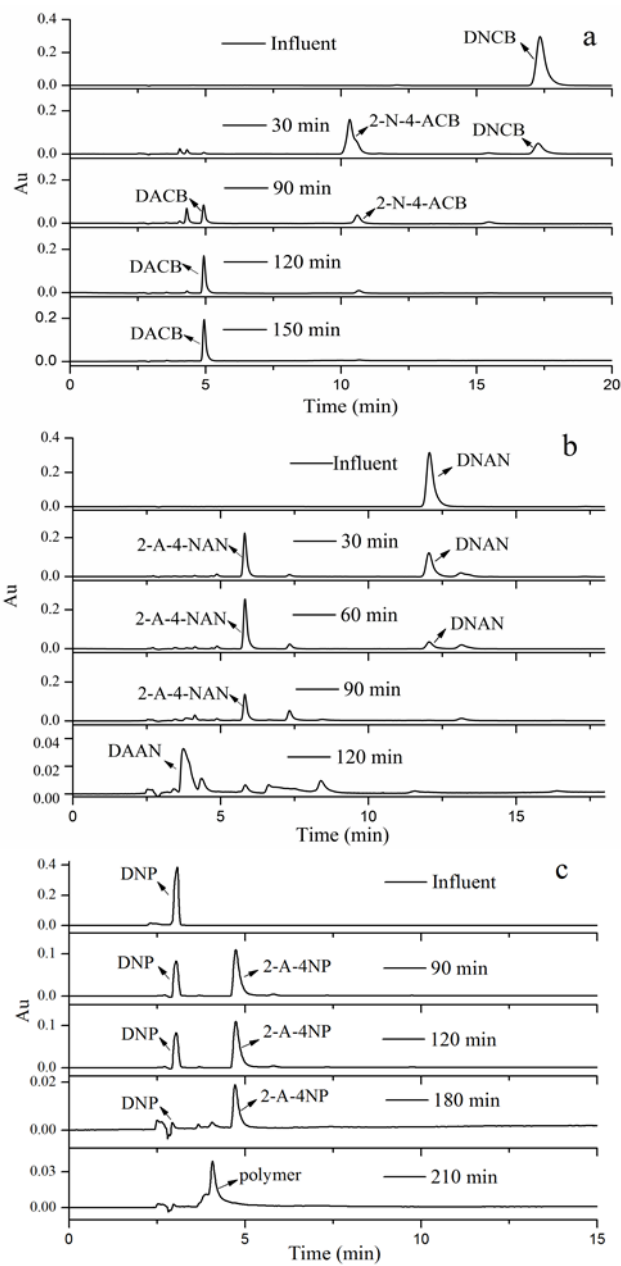

**Figure S1** Evolution of HPLC chromatogram for the three NACs during ZVI reduction process: (a) DNCB; (b) DNAN and (c) DNP.

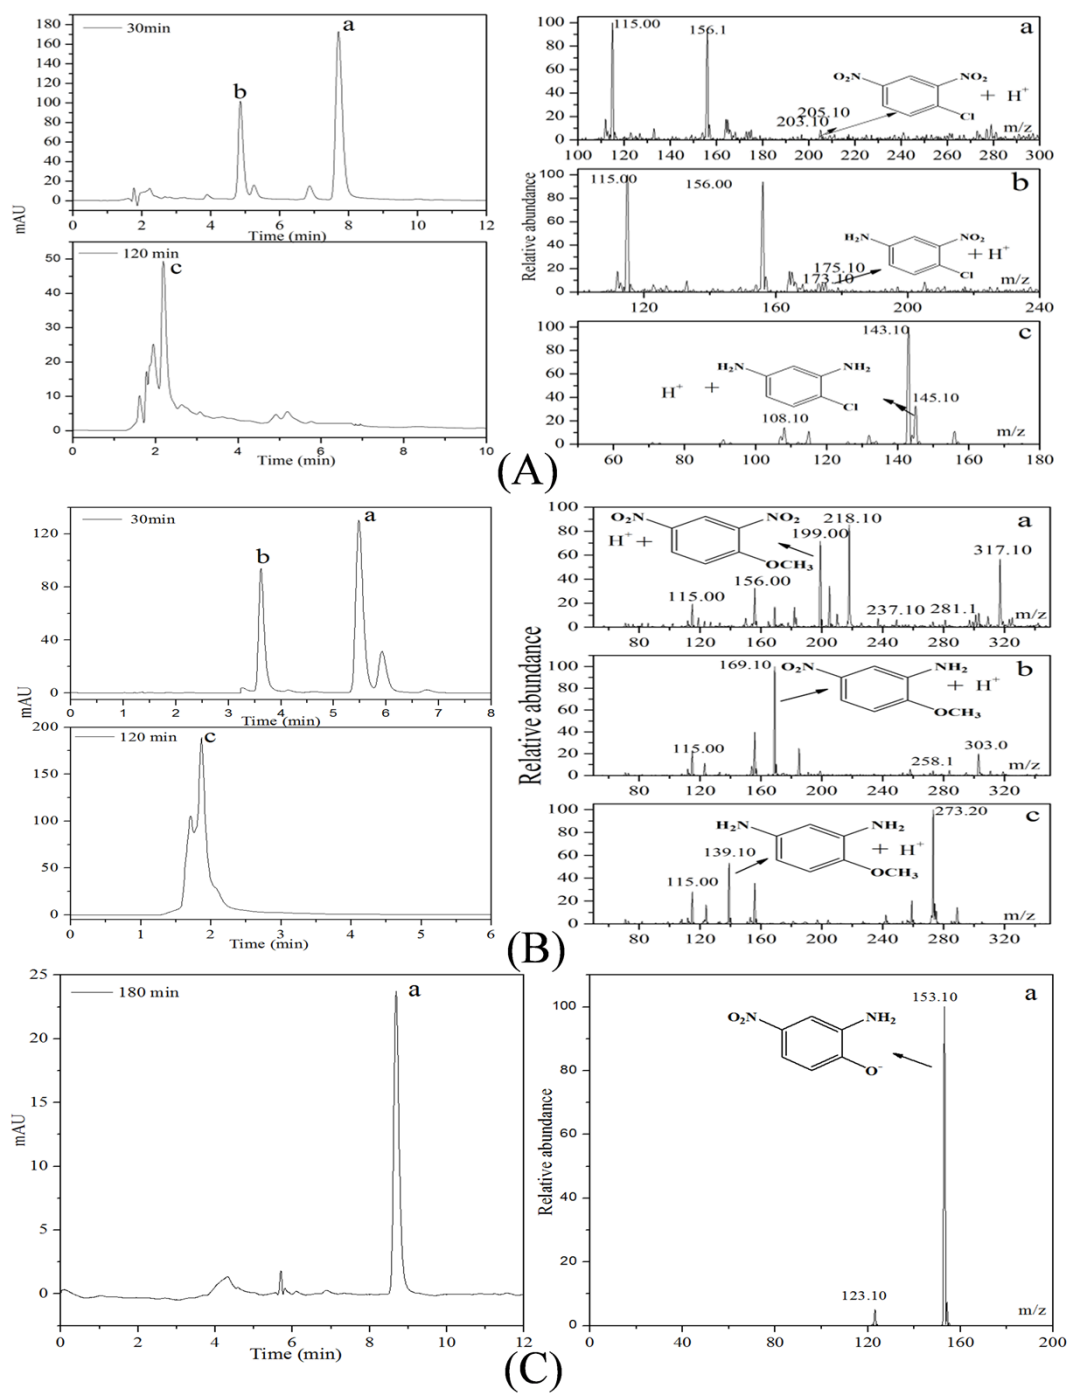

**Fig. S2** HPLC-MS spectra of the reductive products of three NACs by ZVI: (A) DNCB; (B) DNAN and (C) DNP.

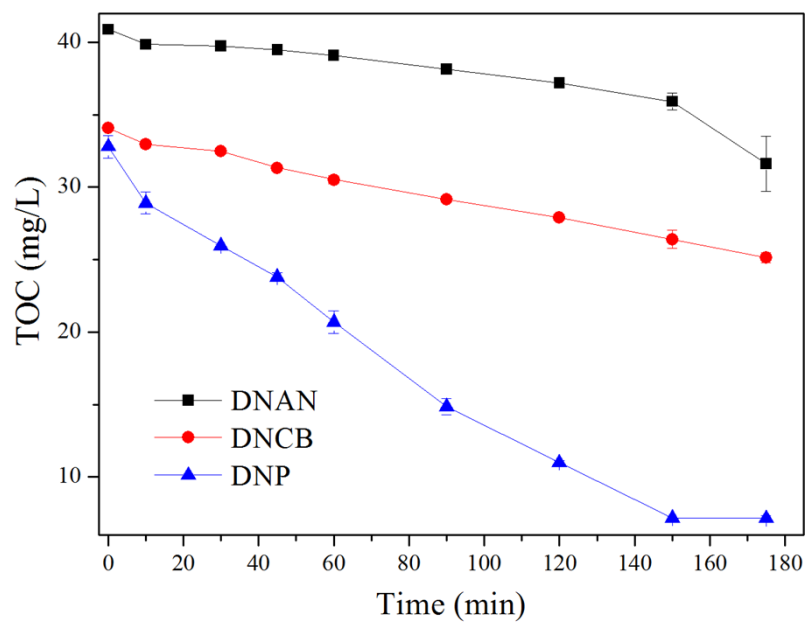

**Figure S3** TOC profiles during the reduction of DNCB, DNAN and DNP in the ZVI system.

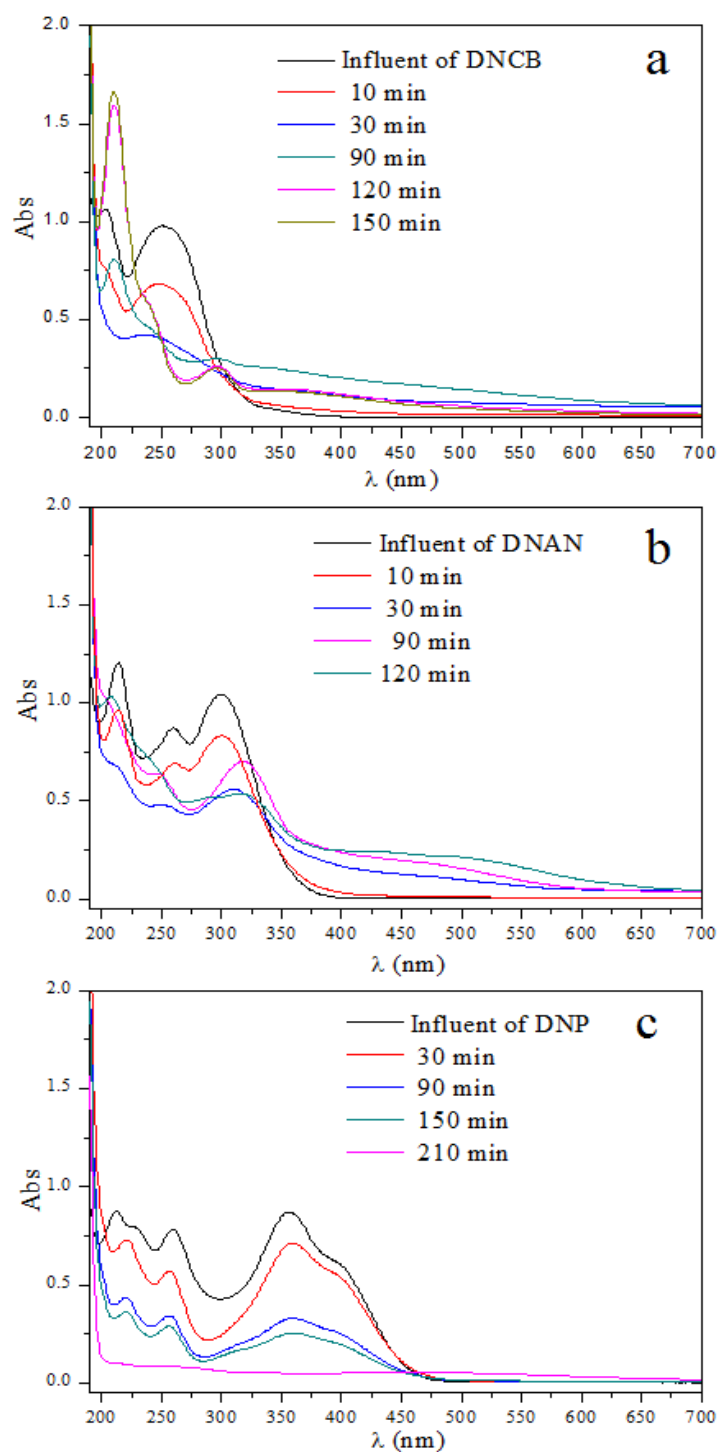

**Figure S4** Evolution of UV-vis spectra for the three NACs during ZVI reduction process: (a) DNCB; (b) DNAN and (c) DNP.

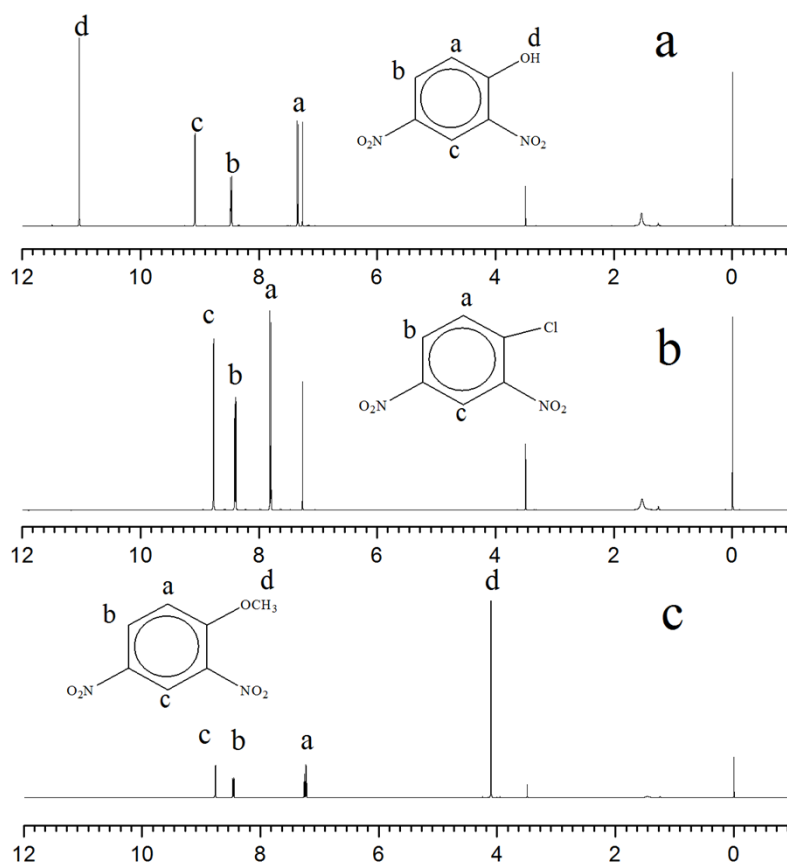

**Figure S5** <sup>1</sup>H NMR spectrum of the three standard NACs: (a) DNP; (b) DNCB and (c) DNAN.
